# Supplementary material for: Exploring the Link between Work Addiction Risk and Health-Related Outcomes Using Job-Demand-Control Model
Source: Int J Environ Res Public Health. 2020 Oct 19;17(20):7594. doi: 10.3390/ijerph17207594 (PMC7593928; doi:10.3390/ijerph17207594)

**Table S1.** Occupations and education levels across the Karasek quadrants.

| Variables                                  | Job-Demand-Control model<br>of Karasek |             |            |         | p-value |
|--------------------------------------------|----------------------------------------|-------------|------------|---------|---------|
|                                            | Active                                 | High-strain | Low-strain | Passive |         |
| Education level                            |                                        |             |            |         |         |
| General Certificate of Secondary Education | 0.0%                                   | 4.6%        | 0.0%       | 0.0%    | .0002   |
| A-level                                    | 3.4%                                   | 0.0%        | 2.7%       | 20.0%   |         |
| Higher National Diploma                    | 5.7%                                   | 9.1%        | 5.4%       | 26.7%   |         |
| Bachelor degree                            | 8.0%                                   | 18.2%       | 16.2%      | 20.0%   |         |
| Master degree                              | 83.0%                                  | 68.2%       | 75.7%      | 33.3%   |         |
| Occupational group, n (%)                  |                                        |             |            |         |         |
| Merchants – Business                       | 5.7%                                   | 0.0%        | 2.7%       | 0.0%    | .050    |
| Employees                                  | 8.0%                                   | 36.4%       | 13.5%      | 40.0%   |         |
| Intermediate profession                    | 6.8%                                   | 9.1%        | 2.7%       | 6.7%    |         |
| Inactive employment                        | 3.4%                                   | 0.0%        | 13.5%      | 13.3%   |         |
| Manager- Intellectual profession           | 76.1%                                  | 54.6%       | 65.6%      | 40.0%   |         |

Figure S1\_NumberOfSubjectsRequired\_300dpi

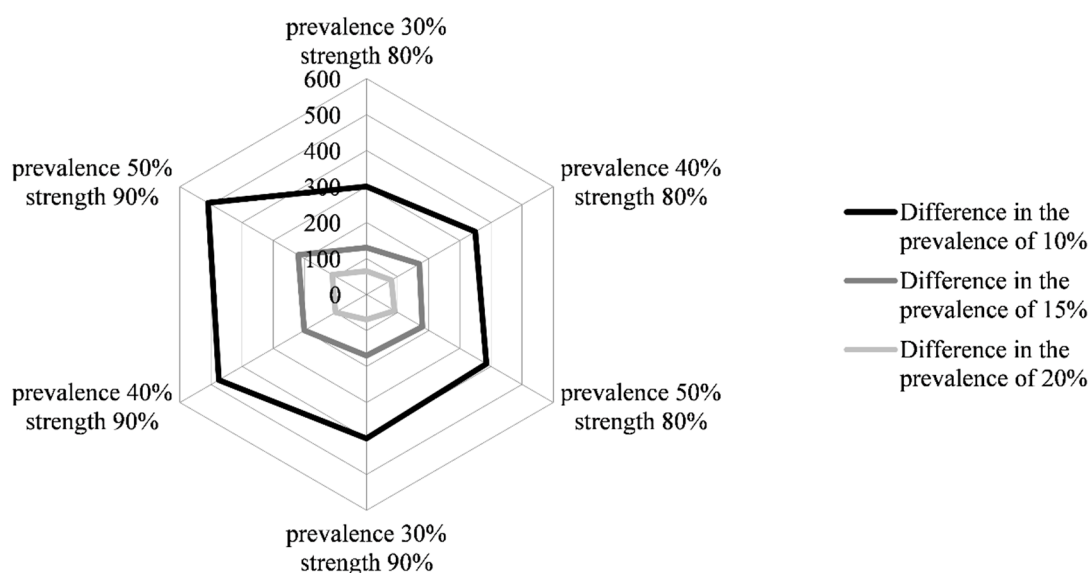

Supplement: Supplementary file 1 [file ijerph-17-07594-s001.pdf]
